# Supplementary material
Source: PubMed Central journal article supplement (PMC7719099)

**SUPPLEMENTAL MATERIAL**

for

**IcyHot analgesic cream triggers remote cardioprotection in rodents**

Yun Wu, MD, Annabel Chen, BS, Yao Lu, MD, Candida L. Goodnough, MD, PhD, Ye Zhang,  
MD, Eric R. Gross, MD, PhD

## **Supplemental Tables:**

### **Supplemental Table 1. Hemodynamics for analgesic cream infarct size studies.**

Hemodynamic results for *in vivo* experimental groups measured at baseline, at 15 minutes of ischemia, and at 2 hours of reperfusion. No significant changes were noted between groups for each phase relative to control. Statistical differences were noted when comparing within groups reperfusion values to baseline values (<sup>+</sup>P<0.01, relative to baseline value, \*P<0.01, relative to control for that time point). Abbreviations for the table are as follows: HR = heart rate (beats/min), MAP = mean arterial pressure (mmHg), RPP = rate pressure product (mmHg/1000).

### **Supplemental Table 2. Hemodynamics for TRPA1 inhibitor infarct size studies.**

Hemodynamic results for *in vivo* experimental groups measured at baseline, at 15 minutes of ischemia, and at 2 hours of reperfusion. No significant changes were noted between groups for each phase relative to control. Statistical differences were noted when comparing within groups reperfusion values to baseline values (<sup>+</sup>P<0.01, relative to baseline value). Abbreviations for the table are as follows: HR = heart rate (beats/min), MAP = mean arterial pressure (mmHg), RPP = rate pressure product (mmHg/1000).

### **Supplemental Table 3. Hemodynamics for timing of IcyHot infarct size studies.**

Hemodynamic results for *in vivo* experimental groups measured at baseline, at 15 minutes of ischemia, and at 2 hours of reperfusion. No significant changes were noted between groups for each phase relative to control. Statistical differences were noted when comparing within groups reperfusion values to baseline values (<sup>+</sup>P<0.01, relative to baseline value). Abbreviations for the table are as follows: HR = heart rate (beats/min), MAP = mean arterial pressure (mmHg), RPP = rate pressure product (mmHg/1000).

## Supplemental Figures:

**Supplemental Figure 1. Area at risk per left ventricle for analgesic cream infarct size studies.** Area at risk per left ventricle percentage (AAR/LV%) for each experimental group. No significant differences were seen between groups.

**Supplemental Figure 2. Dose-response for methyl salicylate in isolated cardiac myocytes subjected to hypoxia-reoxygenation.** Percentage of trypan blue positive cells after isolated adult cardiac myocytes are subjected to 2 hours hypoxia followed by 4 hours reoxygenation. Methyl salicylate dose-dependently reduced the number of trypan blue positive cells after reoxygenation. \*P<0.01 versus DMSO treated control.

**Supplemental Figure 3. Area at risk per left ventricle for TRPA1 inhibitor infarct size studies.** Area at risk per left ventricle percentage (AAR/LV%) for each experimental group. No significant differences were seen between groups.

**Supplemental Figure 4. Area at risk per left ventricle for timing of IcyHot infarct size studies.** Area at risk per left ventricle percentage (AAR/LV%) for each experimental group. No significant differences were seen between groups.

Supplemental Table 1.

|               | n | Baseline |        |      | 15min Ischemia |        |      | 2hr Reperfusion |                   |                   |
|---------------|---|----------|--------|------|----------------|--------|------|-----------------|-------------------|-------------------|
|               |   | HR       | MAP    | RPP  | HR             | MAP    | RPP  | HR              | MAP               | RPP               |
| Control       | 6 | 414±8    | 103±10 | 48±5 | 408±8          | 101±7  | 46±4 | 374±10          | 79±4              | 37±2              |
| IcyHot        | 6 | 440±17   | 112±8  | 57±5 | 437±14         | 92±11  | 47±4 | 412±18          | 79±6 <sup>+</sup> | 40±3 <sup>+</sup> |
| Preparation H | 6 | 418±11   | 119±6  | 59±3 | 441±12         | 108±8  | 58±4 | 425±12          | 91±3 <sup>+</sup> | 52±3 <sup>*</sup> |
| Aspercreme    | 6 | 422±18   | 121±8  | 60±4 | 421±21         | 107±10 | 54±5 | 386±8           | 87±3 <sup>+</sup> | 44±2 <sup>+</sup> |
| Tiger Balm    | 6 | 387±9    | 109±3  | 49±1 | 397±12         | 94±11  | 44±4 | 380±10          | 91±4              | 42±3              |

Supplemental Table 2.

|            | n | Baseline |       |      | 15min Ischemia |       |      | 2hr Reperfusion |                   |                   |
|------------|---|----------|-------|------|----------------|-------|------|-----------------|-------------------|-------------------|
|            |   | HR       | MAP   | RPP  | HR             | MAP   | RPP  | HR              | MAP               | RPP               |
| TCS+IcyHot | 6 | 411±15   | 105±4 | 51±3 | 419±14         | 93±10 | 45±5 | 392±6           | 77±5 <sup>+</sup> | 38±2              |
| AP+IcyHot  | 6 | 421±14   | 117±3 | 55±3 | 423±10         | 109±9 | 50±4 | 383±14          | 82±5 <sup>+</sup> | 38±3 <sup>+</sup> |
| TCS        | 6 | 400±23   | 111±8 | 53±5 | 418±15         | 105±9 | 51±4 | 367±8           | 76±4 <sup>+</sup> | 41±3              |
| AP         | 6 | 404±17   | 122±6 | 58±4 | 421±10         | 124±5 | 58±3 | 375±9           | 79±6 <sup>+</sup> | 41±3 <sup>+</sup> |

Supplemental Table 3.

|                  | n | Baseline |       |      | 15min Ischemia |        |      | 2hr Reperfusion    |                   |                   |
|------------------|---|----------|-------|------|----------------|--------|------|--------------------|-------------------|-------------------|
|                  |   | HR       | MAP   | RPP  | HR             | MAP    | RPP  | HR                 | MAP               | RPP               |
| Control Ischemia | 6 | 406±11   | 104±2 | 50±2 | 422±11         | 86±5   | 42±2 | 384±16             | 78±4 <sup>+</sup> | 38±3              |
| IcyHot Ischemia  | 6 | 396±22   | 106±6 | 50±5 | 397±17         | 94±5   | 45±4 | 365±12             | 79±6 <sup>+</sup> | 36±3 <sup>+</sup> |
| Control 24 hour  | 6 | 409±12   | 113±7 | 54±4 | 448±12         | 107±5  | 55±4 | 390±20             | 82±4 <sup>+</sup> | 41±4 <sup>+</sup> |
| IcyHot 24 hour   | 6 | 417±9    | 132±4 | 65±2 | 411±14         | 116±10 | 58±6 | 357±5 <sup>+</sup> | 98±6 <sup>+</sup> | 44±3 <sup>+</sup> |

Supplemental Figure 1.

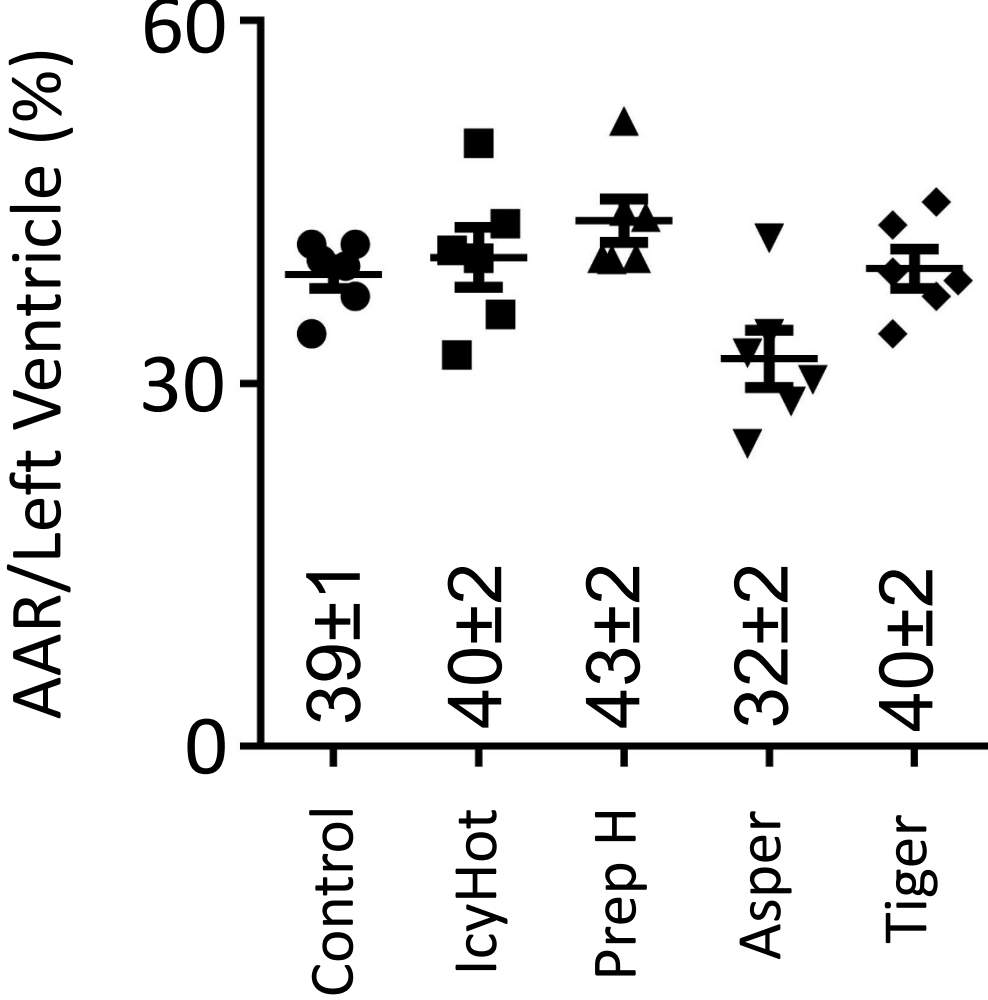

Supplemental Figure 2.

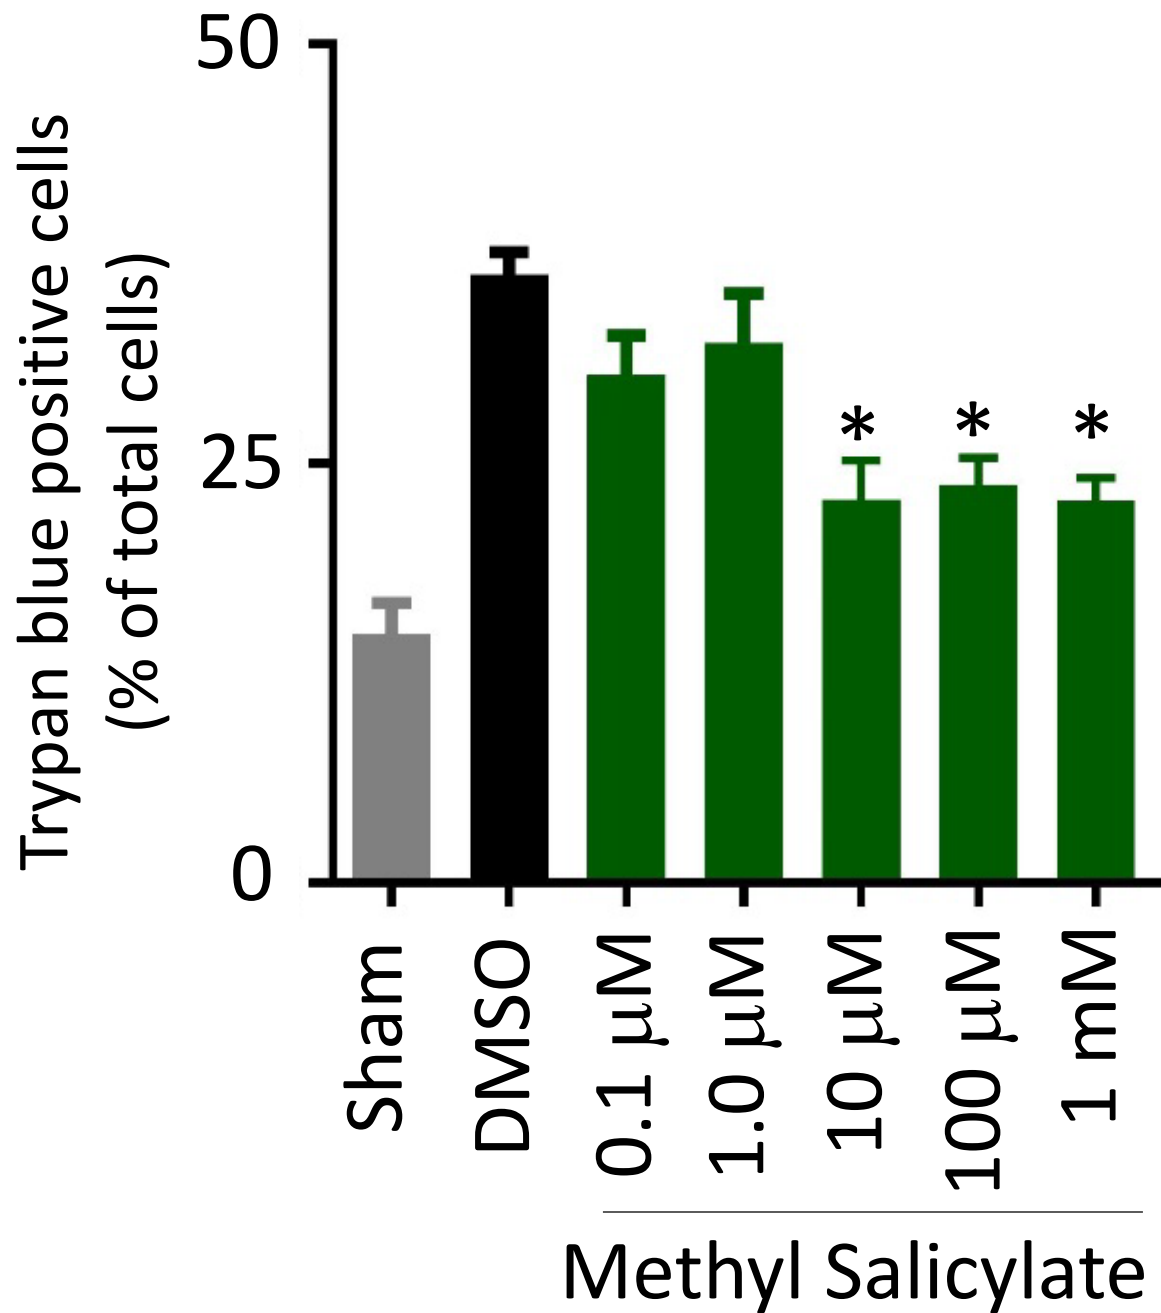



Supplemental Figure 3.

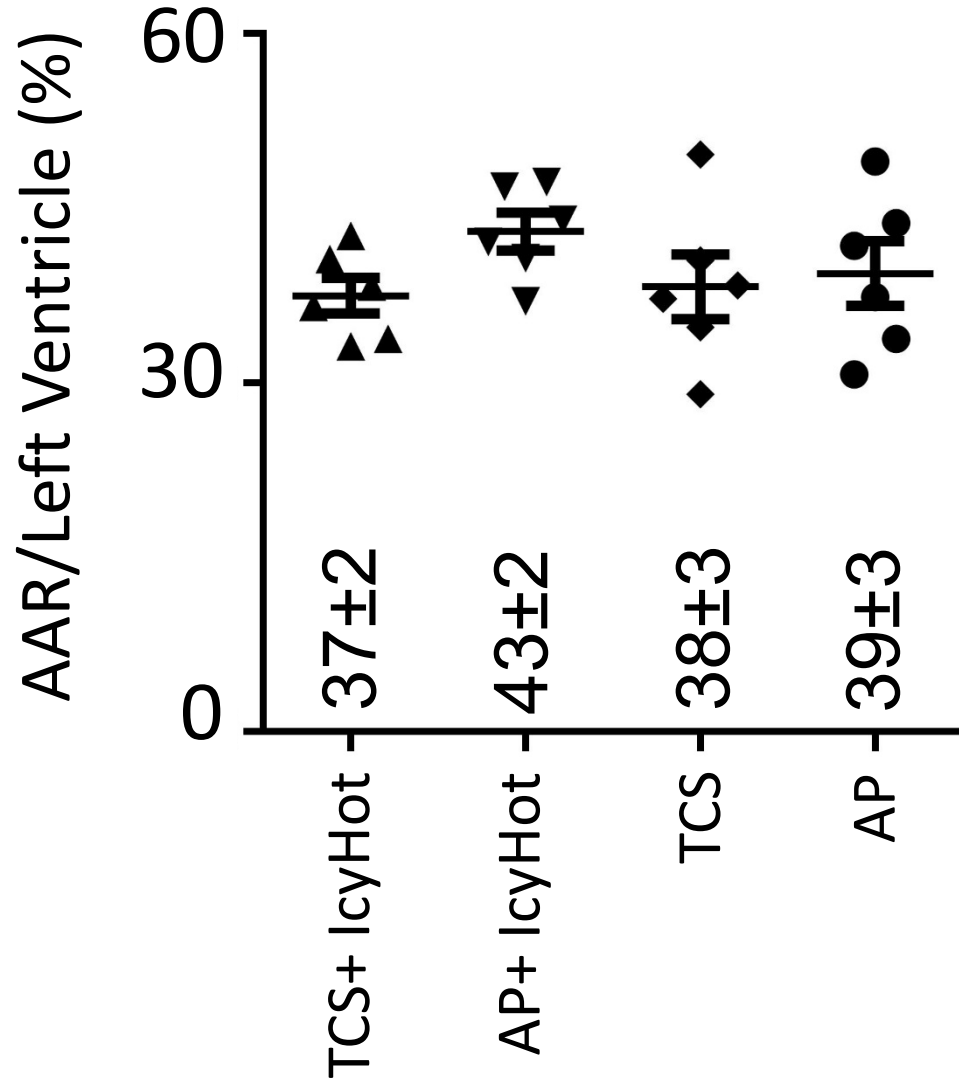

Supplemental Figure 4.

A.

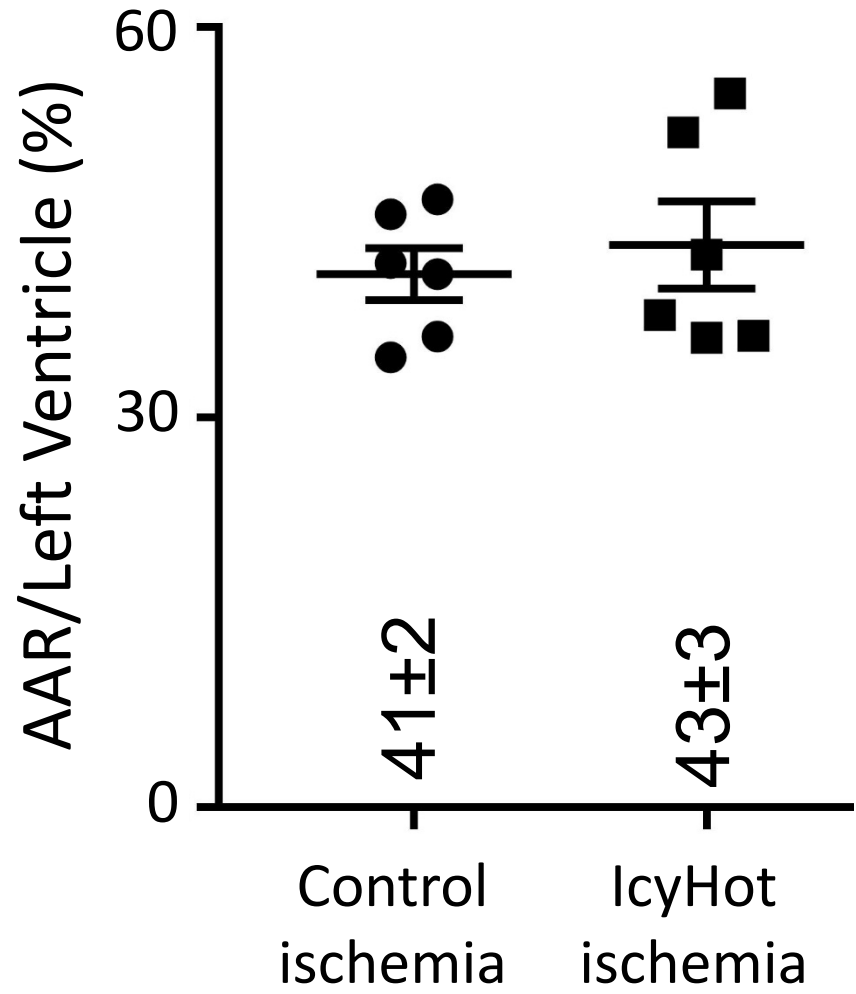

B.

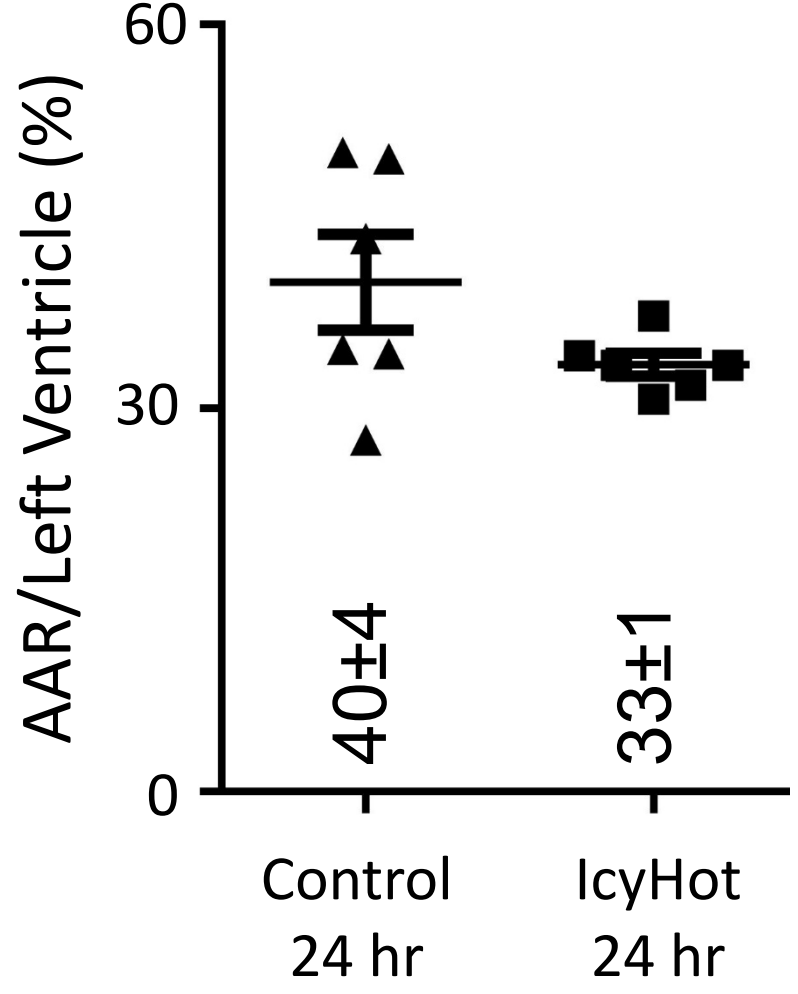

Supplement: NIHMS1610535-supplement-1.pdf [file NIHMS1610535-supplement-1.pdf]
